# Supplementary material for: Isolation of bis(copper) key intermediates in Cu-catalyzed azide-alkyne “click reaction”
Source: PubMed Central journal article supplement — Sci Adv. 2015 Jun 12;1(5):e1500304. doi: 10.1126/sciadv.1500304 (PMC4640605; doi:10.1126/sciadv.1500304), 2015-06-12

## Supplementary Materials for Isolation of bis(copper) key intermediates in Cu-catalyzed azide-alkyne “click reaction”

Liqun Jin, Daniel R. Tolentino, Mohand Melaimi, Guy Bertrand

Published 12 June 2015, *Sci. Adv.* **1**, e1500304 (2015)

DOI: 10.1126/sciadv.1500304

### This PDF file includes:

Supplementary text

Fig. S1.  $^1\text{H}$  NMR of (CAAC)CuOAc in  $\text{CD}_2\text{Cl}_2$ .

Fig. S2.  $^{13}\text{C}$  NMR of (CAAC)CuOAc in  $\text{CD}_2\text{Cl}_2$ .

Fig. S3.  $^1\text{H}$  NMR of (CAAC)CuCl in  $\text{CD}_2\text{Cl}_2$ .

Fig. S4.  $^{13}\text{C}$  NMR of (CAAC)CuCl in  $\text{CD}_2\text{Cl}_2$ .

Fig. S5.  $^1\text{H}$  NMR of (CAAC)CuOTf in  $\text{CDCl}_3$ .

Fig. S6.  $^{13}\text{C}$  NMR of (CAAC)CuOTf in  $\text{CDCl}_3$ .

Fig. S7.  $^1\text{H}$  NMR of **1<sub>Cu</sub>a** in  $\text{CD}_2\text{Cl}_2$ .

Fig. S8.  $^{13}\text{C}$  NMR of **1<sub>Cu</sub>a** in  $\text{CD}_2\text{Cl}_2$ .

Fig. S9.  $^1\text{H}$  NMR of **1<sub>Cu2</sub>a** in  $\text{CD}_2\text{Cl}_2$ .

Fig. S10.  $^{13}\text{C}$  NMR of **1<sub>Cu2</sub>a** in  $\text{CD}_2\text{Cl}_2$ .

Fig. S11.  $^1\text{H}$  NMR of **2<sub>Cu2</sub>a** in  $\text{CD}_2\text{Cl}_2$ .

Fig. S12.  $^{13}\text{C}$  NMR of **2<sub>Cu2</sub>a** in  $\text{CD}_2\text{Cl}_2$ .

Fig. S13.  $^1\text{H}$  NMR of **1<sub>Cu2</sub>b** in  $\text{CD}_2\text{Cl}_2$ .

Fig. S14.  $^{13}\text{C}$  NMR of **1<sub>Cu2</sub>b** in  $\text{CD}_2\text{Cl}_2$ .

Fig. S15.  $^1\text{H}$  NMR of **2<sub>Cu</sub>a** in  $\text{CD}_2\text{Cl}_2$ .

Fig. S16.  $^{13}\text{C}$  NMR of **2<sub>Cu</sub>a** in  $\text{CD}_2\text{Cl}_2$ .

Fig. S17. Evolution of the annulation reaction monitored by  $^1\text{H}$  NMR.

Fig. S18. Evolution of the protodemetalation reaction monitored by  $^1\text{H}$  NMR.

Fig. S19. Evolution of the catalytic reaction between benzyl azide and phenyl acetylene monitored by  $^1\text{H}$  NMR.

Table S1. Crystal data and structure refinement for **1<sub>Cu2</sub>a**.

Table S2. Crystal data and structure refinement for **2<sub>Cu2</sub>a** (X = BF<sub>4</sub>).

Table S3. Crystal data and structure refinement for **1<sub>Cu2</sub>b** (X = BF<sub>4</sub>).

## 1. Experimental details

**General:**  $^1\text{H}$ ,  $^{13}\text{C}$  NMR spectra were recorded on Bruker Avance 300, Jeol ECA 500 and Varian Inova 500 spectrometers. NMR multiplicities are abbreviated as follows: *s* = singlet, *d* = doublet, *t* = triplet, *q* = quartet, *sept* = septet, *m* = multiplet, *br* = broad signal. Chemical shifts are given in ppm and are referenced to  $\text{SiMe}_4$  ( $^1\text{H}$ ,  $^{13}\text{C}$ ) and  $\text{CFCl}_3$  ( $^{19}\text{F}$ ). All spectra were obtained at 25 °C in the solvent indicated. Coupling constants *J* are given in Hz. Mass spectra were performed at the UC San Diego Mass Spectrometry Laboratory. Melting points were measured with an electrothermal MEL-TEMP apparatus. Single crystal X-ray diffraction data were collected on a Bruker Apex II-CCD detector using Mo-K $\alpha$  radiation ( $\lambda = 0.71073 \text{ \AA}$ ). Crystals were selected under oil, mounted on nylon loops, and then immediately placed in a cold stream of nitrogen. Structures were solved and refined using Olex2 and SHELXTL. The CAAC and 3,3-diphenyl-1-propyne were prepared following literature procedures while all other starting materials were purchased from commercial sources.

## 2. Synthesis of CAAC-copper complexes

(CAAC)CuOAc:

THF (20 mL) was added to a mixture of CuOAc (1.0 g, 8.2 mmol) and CAAC (2.6 g, 8.2 mmol). The reaction mixture was stirred overnight at room temperature. The solvent was removed under vacuum. The residue was washed with hexane (10 mL), and then was extracted with benzene (20 mL). After removal of benzene under vacuum, (CAAC)CuOAc was isolated as a white solid. Yield 73% (2.6 g). m.p. 151 °C (dec.)  $^1\text{H}$  NMR ( $\text{CD}_2\text{Cl}_2$ , 500 MHz):  $\delta = 7.44$  (t,  $J = 7.8$  Hz, 1 H, *p*-H), 7.29 (d,  $J = 7.8$  Hz, 2 H, *m*-H), 2.85 (sept,  $J = 6.9$  Hz, 2 H,  $\text{CHMe}_2$ ), 1.99 (s, 2 H,  $\text{CH}_2$ ), 1.96-1.85 (m, 2 H,  $\text{CH}_2$ ), 1.85-1.66 (m, 5 H,  $\text{CH}_2$ ,  $\text{COCH}_3$ ), 1.34 (s, 6 H,  $\text{CH}_3$ ), 1.30 (d,  $J = 6.9$  Hz, 6 H,  $\text{CHCH}_3$ ), 1.25 (d,  $J = 6.9$  Hz, 6 H,  $\text{CHCH}_3$ ), 1.08 (t,  $J = 7.5$  Hz, 6 H,  $\text{CH}_3$ );  $^{13}\text{C}$  NMR ( $\text{CD}_2\text{Cl}_2$ , 125 MHz):  $\delta = 252.5$  ( $C_{\text{carbene}}$ ), 177.6 ( $\text{COCH}_3$ ), 145.5 ( $C_q$ ), 135.4 ( $C_q$ ), 129.8 ( $\text{CH}_{\text{Ar}}$ ), 125.0 ( $\text{CH}_{\text{Ar}}$ ), 81.2 ( $C_q$ ), 62.9 ( $C_q$ ), 42.8 ( $\text{CH}_2$ ), 31.3 ( $\text{CH}_2$ ), 29.5, 29.4, 27.0, 22.4, 9.7.

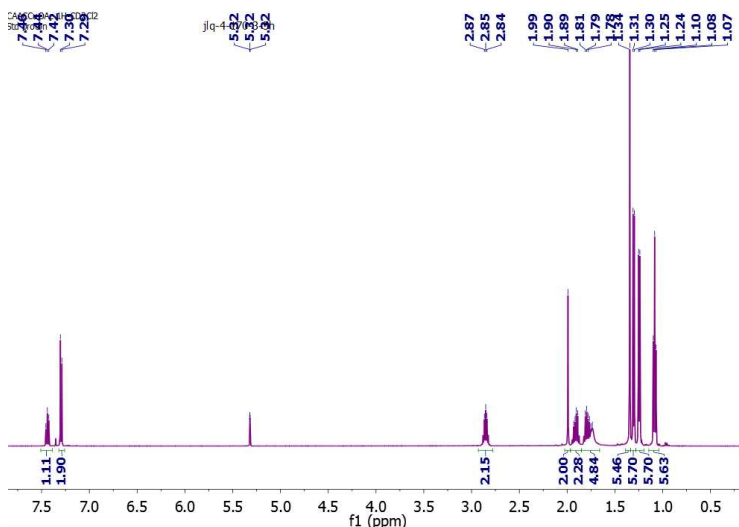

**Figure S1.**  $^1\text{H}$  NMR of (CAAC)CuOAc in  $\text{CD}_2\text{Cl}_2$

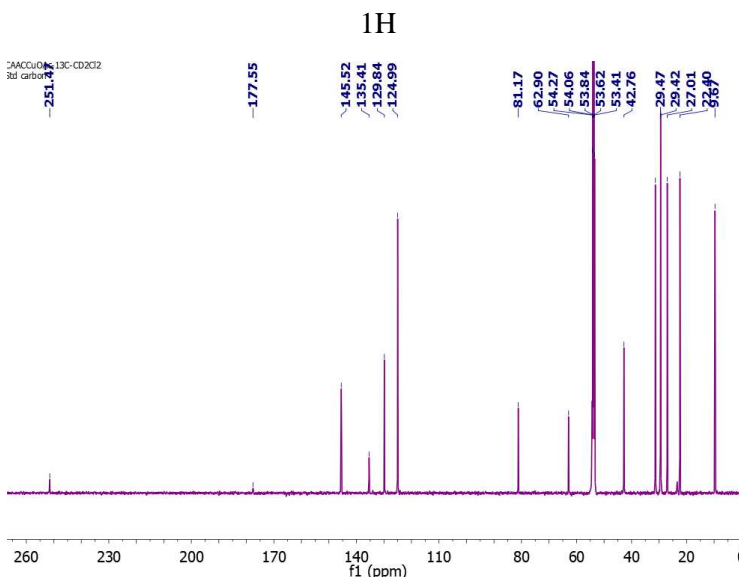

**Figure S2.**  $^{13}\text{C}$  NMR of (CAAC)CuOAc in  $\text{CD}_2\text{Cl}_2$

(CAAC)CuCl:

THF (20 mL) was added to a mixture of CuCl (1.0 g, 10.0 mmol) and CAAC (2.6 g, 8.2 mmol). The mixture was stirred overnight at room temperature. The solvent was removed under vacuum. The remaining solid was washed with hexane (10 mL), and then was extracted with benzene (20 mL). After removal of benzene under vacuum, (CAAC)CuCl was isolated as a white solid. Yield 81% (2.7 g) m.p. 207 °C (dec.).  $^1\text{H}$  NMR ( $\text{CD}_2\text{Cl}_2$ , 500 MHz):  $\delta$  = 7.39 (t,  $J$  = 7.8 Hz, 1 H, *p*-H), 7.25 (d,  $J$  = 7.8 Hz, 2 H, *m*-H), 2.83 (sept,  $J$  = 6.9 Hz, 2 H,  $\text{CHMe}_2$ ), 1.98 (s, 2 H,  $\text{CH}_2$ ), 1.96-1.84 (m, 2 H,  $\text{CH}_2$ ), 1.83-1.71 (m, 5 H,  $\text{CH}_2$ ), 1.35 (s, 6 H,  $\text{CH}_3$ ), 1.30 (d,  $J$  = 6.9 Hz, 6 H,  $\text{CHCH}_3$ ), 1.29 (d,  $J$  = 6.9 Hz, 6 H,  $\text{CHCH}_3$ ), 1.07 (t,  $J$  = 7.5 Hz, 6 H,  $\text{CH}_3$ );  $^{13}\text{C}$  NMR ( $\text{CD}_2\text{Cl}_2$ , 125 MHz):

$\delta = 250.4$  ( $C_{\text{carbene}}$ ), 145.1 ( $C_{\text{q}}$ ), 134.6 ( $C_{\text{q}}$ ), 129.8 ( $\text{CH}_{\text{Ar}}$ ), 124.8 ( $\text{CH}_{\text{Ar}}$ ), 81.1 ( $C_{\text{q}}$ ), 62.7 ( $C_{\text{q}}$ ), 42.5 ( $\text{CH}_2$ ), 31.2 ( $\text{CH}_2$ ), 29.4, 29.3, 27.4, 22.5, 9.7; HRMS (ESI-TOFMS):  $m/z$  calculated for  $\text{C}_{22}\text{H}_{35}\text{CuNCl}[\text{NH}_4]^+$  429.2092, found 429.2091.

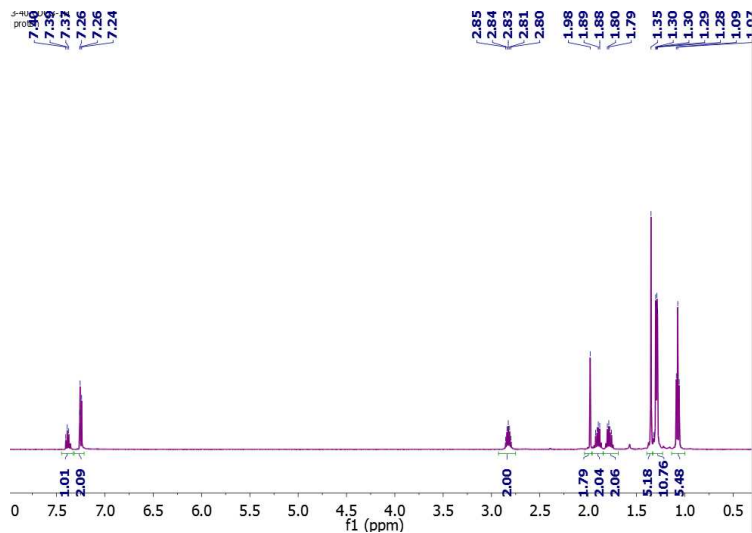

**Figure S3.**  $^1\text{H}$  NMR of  $(\text{CAAC})\text{CuCl}$  in  $\text{CD}_2\text{Cl}_2$

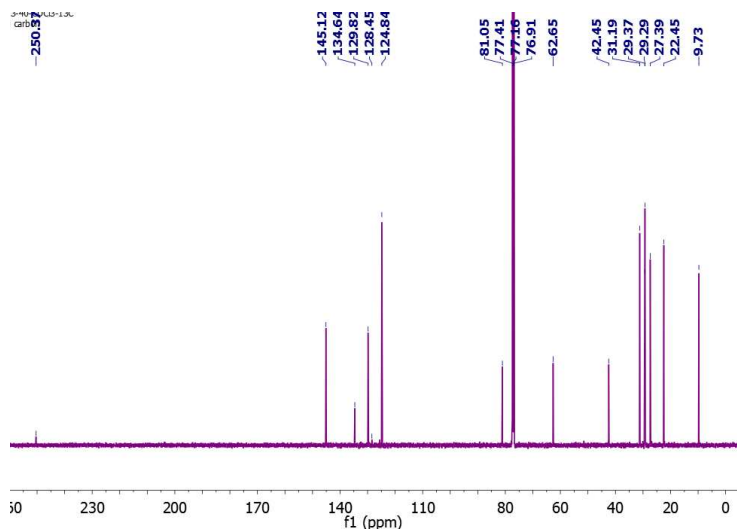

**Figure S4.**  $^{13}\text{C}$  NMR of  $(\text{CAAC})\text{CuCl}$  in  $\text{CD}_2\text{Cl}_2$

$(\text{CAAC})\text{CuOTf}$ :

$\text{AgOTf}$  (135 mg, 0.53 mmol) was added to a solution of  $(\text{CAAC})\text{CuCl}$  (200 mg, 0.48 mmol) in methylene chloride (5 mL) and the solution was stirred in the dark for 30 minutes at room temperature. After filtration, the solvent was removed under vacuum to afford  $(\text{CAAC})\text{CuOTf}$  as a white solid. Yield 73% (184 mg). m.p. 169 °C (dec.)  $^1\text{H}$  NMR ( $\text{CDCl}_3$ , 500 MHz):  $\delta = 7.44$  (t,  $J = 7.8$  Hz, 1 H,  $p$ -H), 7.28 (d,  $J = 7.8$  Hz, 2 H,  $m$ -H), 2.80 (sept,  $J = 6.9$  Hz, 2 H,  $\text{CHMe}_2$ ), 2.02 (s, 2 H,  $\text{CH}_2$ ), 1.96-1.82 (m, 2 H,  $\text{CH}_2$ ),

1.81-1.69 (m, 2 H,  $\text{CH}_2$ ), 1.38 (s, 6 H,  $\text{CH}_3$ ), 1.31 (d,  $J = 6.9$  Hz, 6 H,  $\text{CHCH}_3$ ), 1.23 (d,  $J = 6.9$  Hz, 6 H,  $\text{CHCH}_3$ ), 1.08 (t,  $J = 7.5$  Hz, 6 H,  $\text{CH}_3$ );  $^{13}\text{C}$  NMR ( $\text{CDCl}_3$ , 125 MHz):  $\delta = 248.4$  ( $\text{C}_{\text{carbene}}$ ), 144.9 ( $\text{C}_q$ ), 134.5 ( $\text{C}_q$ ), 130.2 ( $\text{CH}_{\text{Ar}}$ ), 125.0 ( $\text{CH}_{\text{Ar}}$ ), 119.5 (q,  $J = 318$  Hz,  $\text{CF}_3$ ), 81.6 ( $\text{C}_q$ ), 62.4 ( $\text{C}_q$ ), 42.6 ( $\text{CH}_2$ ), 31.0 ( $\text{CH}_2$ ), 29.3, 29.2, 27.1, 22.4, 9.5;  $^{19}\text{F}$  NMR ( $\text{CDCl}_3$ , 282 MHz):  $\delta = -77.7$ .

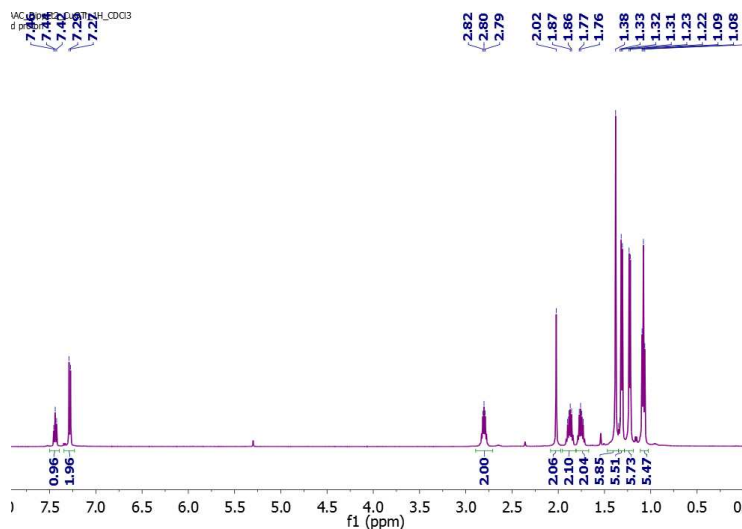

**Figure S5.**  $^1\text{H}$  NMR of  $(\text{CAAC})\text{CuOTf}$  in  $\text{CDCl}_3$

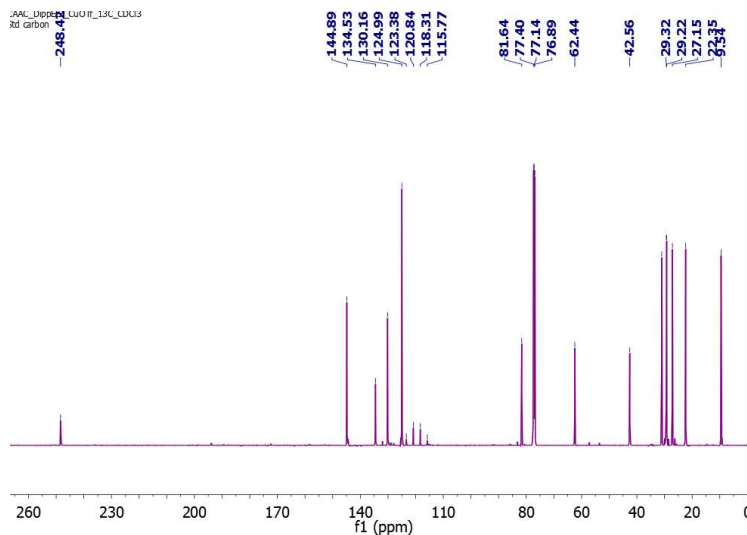

**Figure S6.**  $^{13}\text{C}$  NMR of  $(\text{CAAC})\text{CuOTf}$  in  $\text{CDCl}_3$

**$(\text{CAAC})\text{CuCCPh}$   $\mathbf{1}_{\text{Cu}a}$ :**

*n*-BuLi (2.4 mmol, 2.5 M in hexane) was slowly added to a solution of phenyl acetylene (234 mg, 2.3 mmol) in THF (15 mL) at  $-78$  °C. After 30 minutes a solution of  $(\text{CAAC})\text{CuOAc}$  (1.0 g, 2.3 mmol) in THF (10 mL) was added and the mixture was stirred at ambient temperature for one hour. Volatiles were removed under vacuum and the remaining solid was extracted with benzene (3 x 10 mL). After removal of benzene

under vacuum, the solid was washed with hexane (20 mL). **1<sub>Cu</sub>a** was obtained as a light yellow solid. Yield 88% (970 mg). m.p. 152 °C (dec.) <sup>1</sup>H NMR (CD<sub>2</sub>Cl<sub>2</sub>, 500 MHz): δ = 7.48 (t, *J* = 7.8 Hz, 1 H, *p*-H), 7.34 (d, *J* = 7.8 Hz, 2 H, *m*-H), 7.23 (br d, *J* = 7.1 Hz, 2 H, *o*-H<sub>C<sub>6</sub>H<sub>5</sub></sub>), 7.14 (br t, *J* = 7.1 Hz, 2 H, *m*-H<sub>C<sub>6</sub>H<sub>5</sub></sub>), 7.08 (br t, *J* = 7.1 Hz, 1 H, *p*-H<sub>C<sub>6</sub>H<sub>5</sub></sub>), 2.88 (sept, *J* = 6.9 Hz, 2 H, CHMe<sub>2</sub>), 1.98 (s, 2 H, CH<sub>2</sub>), 1.96-1.87 (m, 2 H, CH<sub>2</sub>), 1.86-1.74 (m, 2 H, CH<sub>2</sub>), 1.39-1.30 (m, 18 H, CH<sub>3</sub>, CHCH<sub>3</sub>), 1.11 (t, *J* = 7.5 Hz, 6 H, CH<sub>3</sub>); <sup>13</sup>C NMR (CD<sub>2</sub>Cl<sub>2</sub>, 125 MHz): δ = 253.5 (C<sub>carbene</sub>), 145.6 (C<sub>q</sub>), 135.1 (C<sub>q</sub>), 131.8 (CH<sub>C<sub>6</sub>H<sub>5</sub></sub>), 129.9 (CH<sub>Ar</sub>), 128.1 (CH<sub>C<sub>6</sub>H<sub>5</sub></sub>), 127.7 (PhCCCu), 125.7 (CH<sub>Ar</sub>), 125.0 (CH<sub>C<sub>6</sub>H<sub>5</sub></sub>), 121.9 (C<sub>q-C<sub>6</sub>H<sub>5</sub></sub>), 106.3 (PhCCCu), 81.3 (C<sub>q</sub>), 63.3 (C<sub>q</sub>), 42.8 (CH<sub>2</sub>), 31.4 (CH<sub>2</sub>), 29.5, 29.4, 27.3, 22.4, 9.9; HRMS (ESI-TOFMS): *m/z* calculated for C<sub>30</sub>H<sub>40</sub>CuNNA<sup>+</sup> 500.2349, found 500.2355.

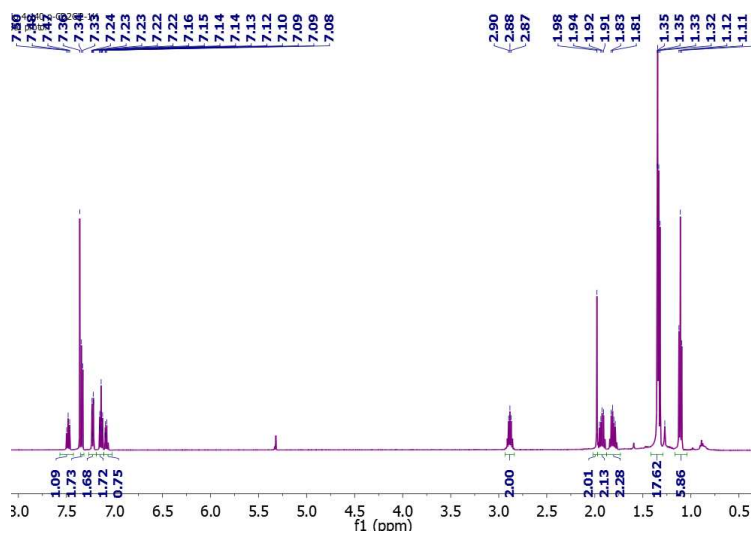

**Figure S7.** <sup>1</sup>H NMR of **1<sub>Cu</sub>a** in CD<sub>2</sub>Cl<sub>2</sub>

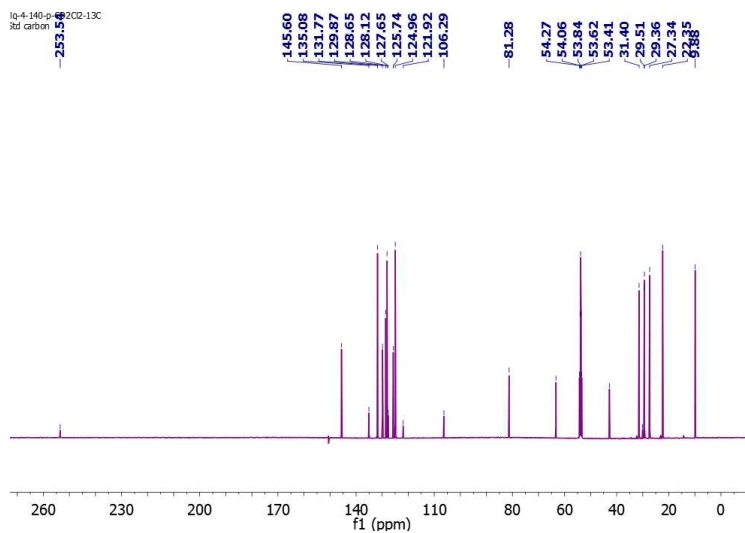

**Figure S8.** <sup>13</sup>C NMR of **1<sub>Cu</sub>a** in CD<sub>2</sub>Cl<sub>2</sub>

Bis(copper) acetylide complexes **1<sub>Cu2a</sub>**:

**1<sub>Cu2a</sub>** (X=OTf):

(CAAC)CuOTf (530 mg, 1 mmol) was added to a solution of **1<sub>Cu1a</sub>** (480 mg, 1 mmol) in methylene chloride (20 mL). The reaction was stirred for 5 minutes at ambient temperature. After removing the solvent under vacuum, **1<sub>Cu2a</sub>** was obtained as a white solid. Yield 95% (952 mg). m.p. 174 °C (dec.). <sup>1</sup>H NMR (CD<sub>2</sub>Cl<sub>2</sub>, 500 MHz): δ = 7.44 (t, *J* = 7.8 Hz, 2 H, *p*-H), 7.26 (d, *J* = 7.8 Hz, 4 H, *m*-H), 7.22 (t, *J* = 7.6 Hz, 1 H, *p*-H), 7.04 (t, *J* = 7.6 Hz, 2 H, *m*-H), 6.41 (d, *J* = 7.6 Hz, 2 H, *o*-H), 2.82 (sept, *J* = 6.9 Hz, 4 H, CHMe<sub>2</sub>), 2.05 (s, 4 H, CH<sub>2</sub>), 1.96-1.83 (m, 4 H, CH<sub>2</sub>), 1.80-1.68 (m, 4 H, CH<sub>2</sub>), 1.38 (s, 12H, CH<sub>3</sub>), 1.29 (d, *J* = 6.9 Hz, 12 H, CHCH<sub>3</sub>), 1.18-1.02 (m, 24 H); <sup>13</sup>C NMR (CD<sub>2</sub>Cl<sub>2</sub>, 125 MHz): δ = 249.4 (C<sub>carbene</sub>), 145.3 (C<sub>q-Aro</sub>), 134.7 (C<sub>q-Aro</sub>), 132.0 (CH<sub>Aro</sub>), 130.4 (CH<sub>Aro</sub>), 129.4 (CH<sub>Aro</sub>), 128.7 (CH<sub>Aro</sub>), 125.4 (CH<sub>Aro</sub>), 122.2 (PhCCCu<sub>2</sub>), 118.9 (C<sub>q-Aro</sub>), 110.8 (PhCCCu<sub>2</sub>), 82.5 (C<sub>q</sub>), 63.1 (C<sub>q</sub>), 42.1 (CH<sub>2</sub>), 31.5 (CH<sub>2</sub>), 29.4, 27.2, 22.4, 9.9; HRMS (ESI-TOFMS): *m/z* calculated for C<sub>52</sub>H<sub>75</sub>Cu<sub>2</sub>N<sub>2</sub><sup>+</sup> 853.4517, found 853.4507.

**1<sub>Cu2a</sub>** (X=BF<sub>4</sub>):

Methylene chloride (4 mL) was added to a mixture of **1<sub>Cu1a</sub>** (180 mg, 0.38 mmol) and Ph<sub>3</sub>C<sup>+</sup>BF<sub>4</sub><sup>-</sup> (62 mg, 0.19 mmol). The mixture was stirred for 5 minutes at room temperature. The solvent was removed under vacuum and the remaining solid was washed with pentane (15 mL), affording **1<sub>Cu2a</sub>** (X=BF<sub>4</sub>) as a light yellow solid. Yield 93% (166 mg). Single crystals of **1<sub>Cu2a</sub>** (X=BF<sub>4</sub>) were obtained by diffusion of diethyl ether into a saturated methylene chloride solution.

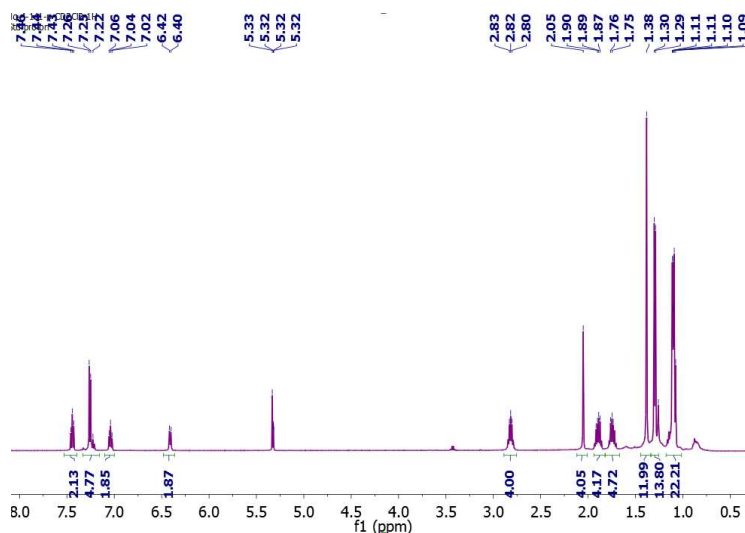

**Figure S9.** <sup>1</sup>H NMR of **1<sub>Cu2a</sub>** in CD<sub>2</sub>Cl<sub>2</sub>

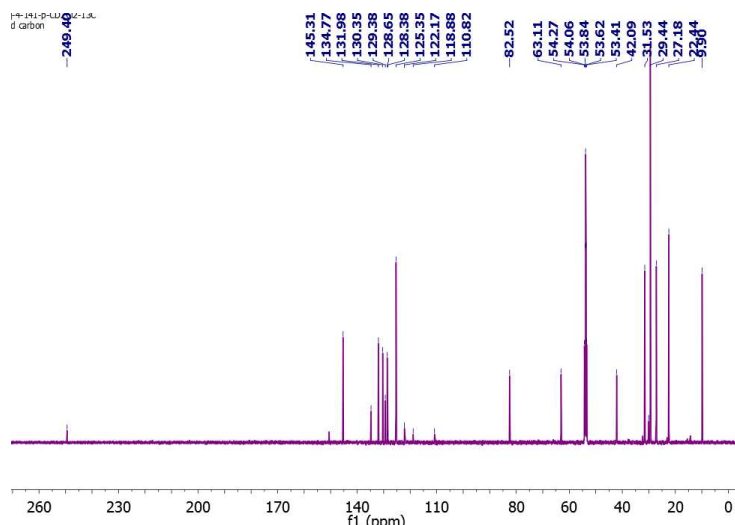

**Figure S10.**  $^{13}\text{C}$  NMR of  $1_{\text{Cu}2\text{a}}$  in  $\text{CD}_2\text{Cl}_2$

Bis(copper) triazole complexes  $2_{\text{Cu}2\text{a}}$  and  $2_{\text{Cu}2\text{a}}$  ( $\text{X}=\text{BF}_4$ ):

Benzyl azide (40.0 mg, 0.30 mmol) was added to a solution of  $1_{\text{Cu}2\text{a}}$  (250 mg, 0.25 mmol) in methylene chloride (0.5 mL). After 1 hour, diethyl ether (15 mL) was added to induce the precipitation of the product. After filtration  $2_{\text{Cu}2\text{a}}$  was isolated as a pale yellow solid. Yield 87% (246 mg). m.p. 175 °C (dec.). The same procedure was used for the synthesis of  $2_{\text{Cu}2\text{a}}$  ( $\text{X}=\text{BF}_4$ ), starting from  $1_{\text{Cu}2\text{a}}$  ( $\text{X}=\text{BF}_4$ ) (236 mg, 0.25 mmol), and was isolated as a pale yellow solid. Yield 83% (223 mg). m.p. 182 °C (dec.).  $^1\text{H}$  NMR ( $\text{CD}_2\text{Cl}_2$ , 500 MHz):  $\delta$  = 7.48-7.38 (m, 2 H, *p*-H), 7.34-7.14 (m, 12 H), 6.82 (br, 2 H), 5.11 (s, 2 H,  $\text{CH}_2\text{Ph}$ ), 2.77 (sept,  $J$  = 6.9 Hz, 4 H,  $\text{CHMe}_2$ ), 2.01 (s, 2 H,  $\text{CH}_2$ ), 1.96 (s, 2 H,  $\text{CH}_2$ ), 1.85-1.73 (m, 2 H,  $\text{CH}_2$ ), 1.73-1.61 (m, 4 H,  $\text{CH}_2$ ), 1.61-1.51 (m, 2 H,  $\text{CH}_2$ ), 1.34 (br, 12 H,  $\text{CH}_3$ ), 1.29-1.20 (m, 12 H,  $\text{CHCH}_3$ ), 1.04-0.86 (m, 24 H);  $^{13}\text{C}$  NMR ( $\text{CD}_2\text{Cl}_2$ , 125 MHz):  $\delta$  = 252.7 ( $\text{C}_{\text{carbene}}$ ), 249.3 ( $\text{C}_{\text{carbene}}$ ), 156.7 ( $\text{C}_{\text{triazolide}}$ ), 155.1 ( $\text{C}_{\text{triazolide}}$ ), 145.4 ( $\text{C}_q$ ), 145.3 ( $\text{C}_q$ ), 136.7 ( $\text{C}_{q\text{Ar}}$ ), 135.2 ( $\text{C}_q$ ), 134.8 ( $\text{C}_q$ ), 133.3 ( $\text{C}_{q\text{Ar}}$ ), 130.3 ( $\text{CH}_{\text{Ar}}$ ), 130.2 ( $\text{CH}_{\text{Ar}}$ ), 129.1 ( $\text{CH}_{\text{Ar}}$ ), 128.8 ( $\text{CH}_{\text{Ar}}$ ), 128.2 ( $\text{CH}_{\text{Ar}}$ ), 128.1 ( $\text{C}_{q\text{-Ar}}$ ), 128.0 ( $\text{CH}_{\text{Ar}}$ ), 127.1 ( $\text{CH}_{\text{Ar}}$ ), 125.2 ( $\text{CH}_{\text{Ar}}$ ), 125.1 ( $\text{CH}_{\text{Ar}}$ ), 82.3 ( $\text{C}_q$ ), 81.9 ( $\text{C}_q$ ), 63.3 ( $\text{C}_q$ ), 63.0 ( $\text{C}_q$ ), 57.1 ( $\text{CH}_2\text{Ph}$ ), 42.4 ( $\text{CH}_2$ ), 31.3 ( $\text{CH}_2$ ), 29.4, 27.0, 22.3, 9.7. HRMS (ESI-TOFMS):  $m/z$  calculated for  $\text{C}_{59}\text{H}_{82}\text{Cu}_2\text{N}_5^+$  986.5157, found 986.5161. Single crystals of  $2_{\text{Cu}2\text{a}}$  ( $\text{X}=\text{BF}_4$ ) were obtained by diffusion of hexane into a saturated methylene chloride solution.



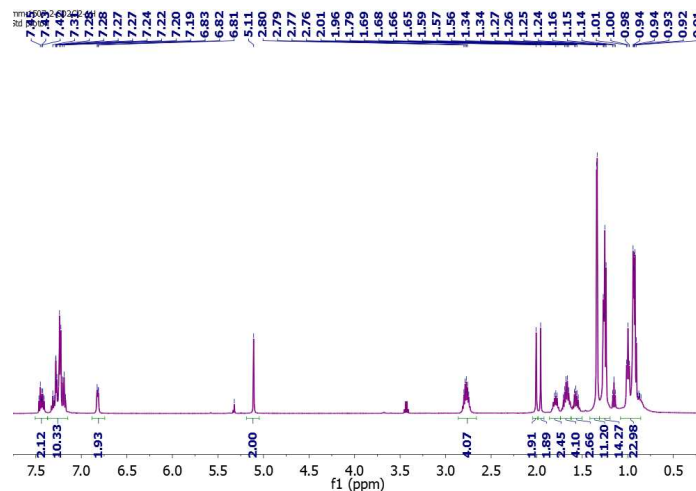

**Figure S11.**  $^1\text{H}$  NMR of  $2_{\text{Cu}2\text{a}}$  in  $\text{CD}_2\text{Cl}_2$

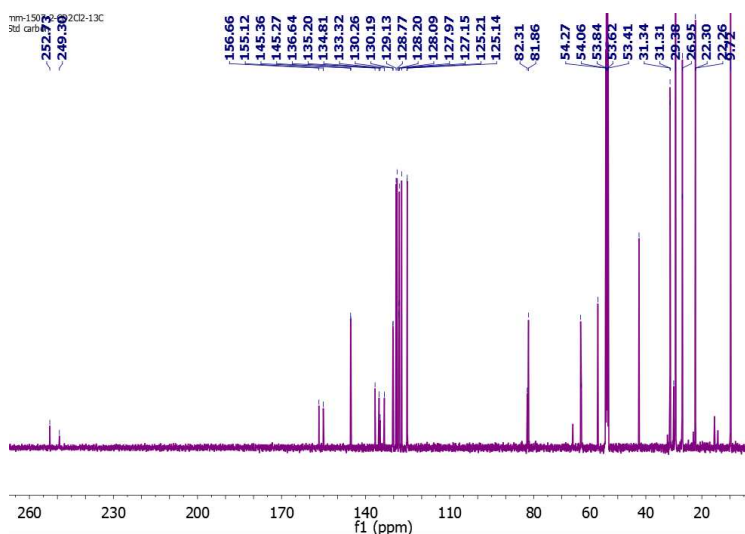

**Figure S12.**  $^{13}\text{C}$  NMR of  $2_{\text{Cu}2\text{a}}$  in  $\text{CD}_2\text{Cl}_2$

Bis(copper) acetylide complex  $1_{\text{Cu}2\text{a}}$  by proto-demetalation of  $2_{\text{Cu}2\text{a}}$ :

Phenylacetylene (15 mg, 0.15 mmol) was added to the solution of  $2_{\text{Cu}2\text{a}}$  (136 mg, 0.12 mmol) in methylene chloride (5 mL). After stirring 16 hours at room temperature, the solvent was removed under vacuum. The remaining solid was washed with diethyl ether (3 x 10 mL) to remove triazole **3** and after drying  $1_{\text{Cu}2\text{a}}$  was obtained as a yellow solid Yield 91% (108 mg). NMR data are identical to those of a sample prepared as described above.

Bis(copper) acetylide complex  $1_{\text{Cu}2\text{b}}$  by proto-demetalation of  $2_{\text{Cu}2\text{a}}$  ( $\text{X}=\text{BF}_4$ ):

3,3-Diphenyl-1-propyne (26 mg, 0.14 mmol) was added to the solution of  $2_{\text{Cu}2\text{a}}$  ( $\text{X}=\text{BF}_4$ ) (120 mg, 0.11 mmol) in methylene chloride (5 mL). After stirring 16 hours at

room temperature, the solvent was removed under vacuum. The remaining solid was washed with diethyl ether (3 x 10 mL) to remove triazole **3** and after drying **1Cu2b** (X=BF<sub>4</sub>) was obtained as a yellow solid. Yield 87% (100 mg). m.p. 185 °C (dec.). <sup>1</sup>H NMR (CD<sub>2</sub>Cl<sub>2</sub>, 500 MHz): δ = 7.56 (t, *J* = 7.8 Hz, 2 H, *p*-H), 7.32 (d, *J* = 7.8 Hz, 4 H, *m*-H), 7.22 (t, *J* = 7.6 Hz, 1 H, *p*-H), 7.24-7.06 (m, 6 H, *H*<sub>Ar</sub>), 6.84 (d, *J* = 6.2 Hz, 4 H, *H*<sub>Ar</sub>), 3.43 (br, 1 H, CHCC), 2.80 (sept, *J* = 6.9 Hz, 4 H, CHMe<sub>2</sub>), 2.04 (s, 4 H, CH<sub>2</sub>), 1.89-1.77 (m, 4 H, CH<sub>2</sub>), 1.75-1.62 (m, 4 H, CH<sub>2</sub>), 1.40 (s, 12H, CH<sub>3</sub>), 1.29 (d, *J* = 6.9 Hz, 12 H, CHCH<sub>3</sub>), 1.12-0.98 (m, 24 H); <sup>13</sup>C NMR (CD<sub>2</sub>Cl<sub>2</sub>, 125 MHz): δ = 249.9 (C<sub>carbene</sub>), 145.6 (C<sub>q</sub>), 141.1 (CCCu<sub>2</sub>), 135.0 (C<sub>q</sub>), 130.4 (CH<sub>Ar</sub>), 128.8 (CH<sub>C6H5</sub>), 127.3 (CH<sub>C6H5</sub>), 125.5 (CH<sub>Ar</sub>), 120.1 (C<sub>q-C6H5</sub>), 109.0 (CCCu<sub>2</sub>), 82.3 (C<sub>q</sub>), 62.8 (C<sub>q</sub>), 46.5 (CHCC), 42.5 (CH<sub>2</sub>), 31.4 (CH<sub>2</sub>), 29.5, 29.4, 27.1, 22.6, 9.9; HRMS (ESI-TOFMS): *m/z* calculated for C<sub>59</sub>H<sub>81</sub>Cu<sub>2</sub>N<sub>2</sub><sup>+</sup> 943.4986, found 943.5004. Single crystals of **1Cu2b** (X=BF<sub>4</sub>) were obtained by diffusion of diethyl ether into a saturated methylene chloride solution.

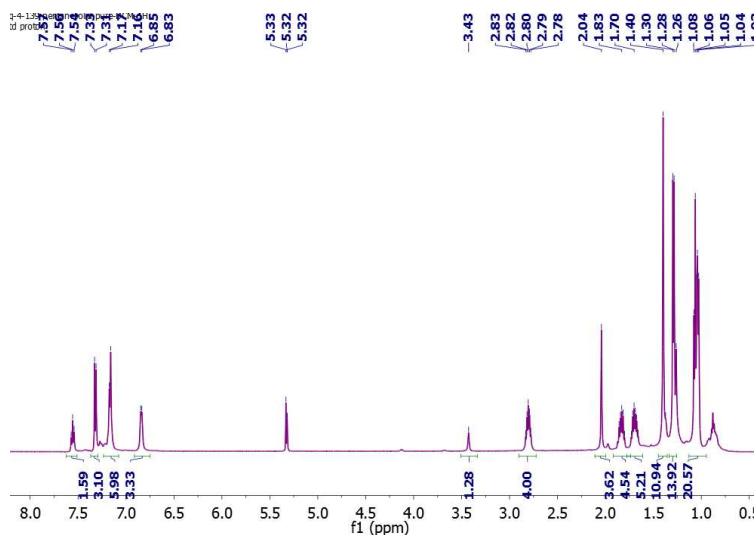

**Figure S13.** <sup>1</sup>H NMR of **1Cu2b** in CD<sub>2</sub>Cl<sub>2</sub>

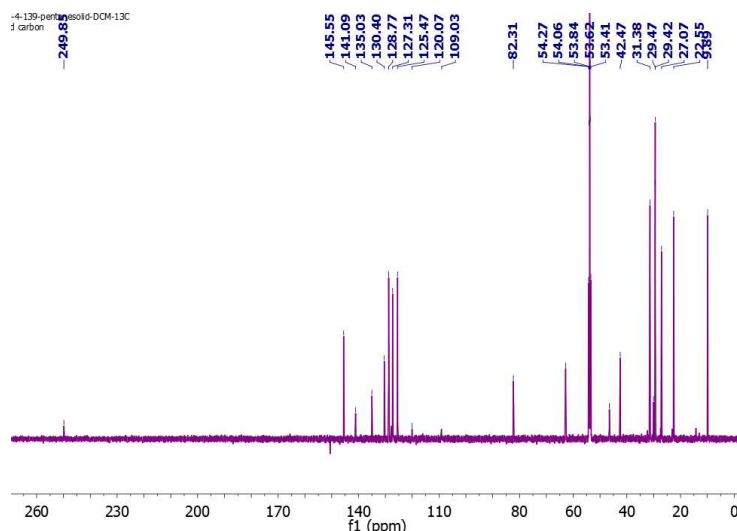

**Figure S14.**  $^{13}\text{C}$  NMR of  $1_{\text{Cu}2\text{b}}$  in  $\text{CD}_2\text{Cl}_2$

**Mono(copper) triazole complex  $2_{\text{Cu}a}$ :**

Benzyl azide (68.2 mg, 0.51 mmol) was added to a solution of  $1_{\text{Cu}a}$  (200 mg, 0.42 mmol) in methylene chloride (0.5 mL). After 15 hours, diethyl ether (15 mL) was added to induce the precipitation of the product. After filtration, the residue was washed with pentane (10 mL) to afford  $2_{\text{Cu}a}$  as a pale yellow solid. Yield 61% (156 mg). m.p. 155 °C (dec.)  $^1\text{H}$  NMR ( $\text{CD}_2\text{Cl}_2$ , 300 MHz):  $\delta$  = 7.78 (br d,  $J$  = 7.5 Hz, 2 H), 7.48 (t,  $J$  = 7.8 Hz, 1 H,  $p$ -H), 7.35-7.07 (m, 8 H), 6.84 (br, d,  $J$  = 7.5 Hz, 2 H), 5.21 (s, 2 H,  $\text{CH}_2\text{Ph}$ ), 2.87 (sept,  $J$  = 6.9 Hz, 2 H,  $\text{CHMe}_2$ ), 1.99 (s, 2 H,  $\text{CH}_2$ ), 1.89-1.63 (m, 4 H,  $\text{CH}_2$ ), 1.37 (s, 6 H,  $\text{CH}_3$ ), 1.27 (d,  $J$  = 6.9 Hz, 6 H,  $\text{CHCH}_3$ ), 1.07 (d,  $J$  = 6.9 Hz, 6 H,  $\text{CHCH}_3$ ), 1.00 (t,  $J$  = 7.5 Hz, 6 H,  $\text{CH}_2\text{CH}_3$ );  $^{13}\text{C}\{^1\text{H}\}$  NMR ( $\text{CD}_2\text{Cl}_2$ , 125 MHz):  $\delta$  = 254.0 ( $C_{\text{carbene}}$ ), 156.1 ( $C_{\text{triazolide}}$ ), 152.8 ( $C_{\text{triazolide}}$ ), 145.7 ( $C_{\text{q}}$ ), 139.2, 136.7 ( $C_{\text{qAr}}$ ), 135.4 ( $C_{\text{q}}$ ), 130.2 ( $\text{CH}_{\text{Ar}}$ ), 128.5 ( $\text{CH}_{\text{Ar}}$ ), 128.4 ( $\text{CH}_{\text{Ar}}$ ), 127.2 ( $\text{CH}_{\text{Ar}}$ ), 126.8, 126.3, 125.8, 125.3 ( $\text{CH}_{\text{Ar}}$ ), 81.6 ( $C_{\text{q}}$ ), 63.5 ( $C_{\text{q}}$ ), 55.9 ( $\text{CH}_2\text{Ph}$ ), 42.4 ( $\text{CH}_2$ ), 31.6 ( $\text{CH}_2$ ), 29.5, 27.0, 22.5, 9.8; HRMS (ESI-TOFMS):  $m/z$  calculated for  $\text{C}_{37}\text{H}_{48}\text{CuN}_4^+$  611.3169, found 611.3166.

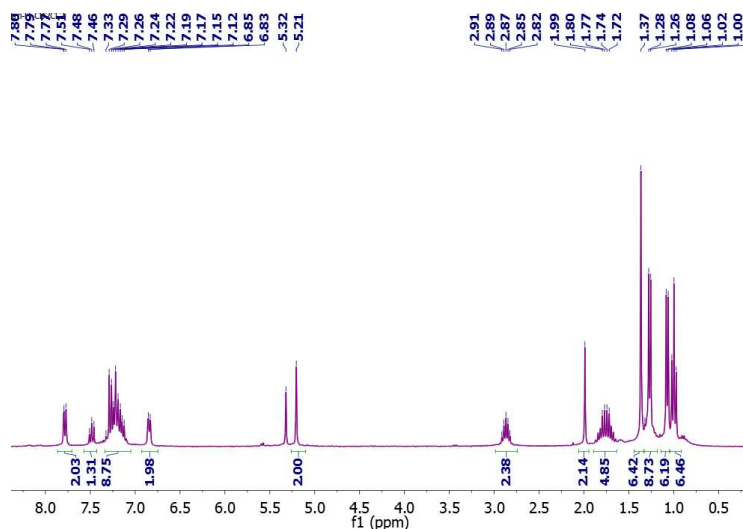

**Figure S15.**  $^1\text{H}$  NMR of  $2_{\text{Cu}}\mathbf{a}$  in  $\text{CD}_2\text{Cl}_2$

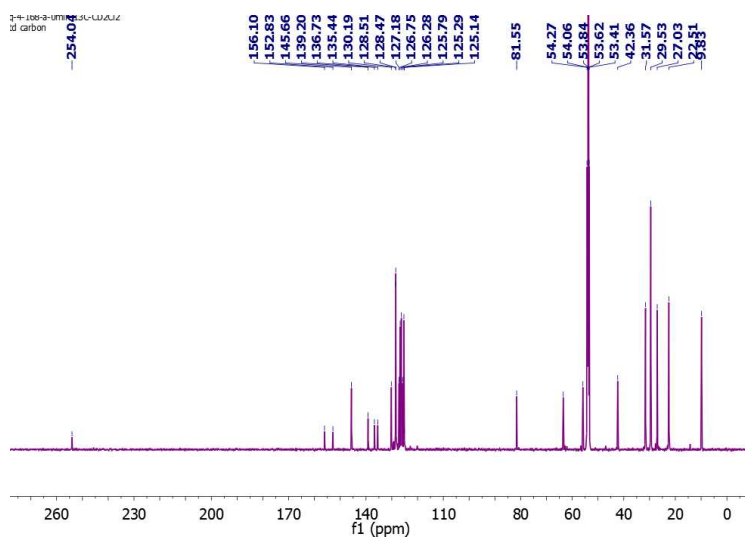

**Figure S16.**  $^{13}\text{C}$  NMR of  $2_{\text{Cu}}\mathbf{a}$  in  $\text{CD}_2\text{Cl}_2$

Mono(copper) acetylide complex  $1_{\text{Cu}}\mathbf{a}$  by proto-demetalation of  $2_{\text{Cu}}\mathbf{a}$ :

Phenylacetylene (27  $\mu\text{L}$ , 0.25 mmol) was added to the solution of  $2_{\text{Cu}}\mathbf{a}$  (15.3 mg, 0.025 mmol) in methylene chloride (0.4 mL). After stirring for 4.5 hours at room temperature, the solvent was removed under vacuum. The remaining solid was washed with pentane (10 mL) to remove triazole  $3$  and after drying  $1_{\text{Cu}}\mathbf{a}$  was obtained as a yellow solid in 73% yield. NMR data are identical to those of a sample prepared as described above.

### 3. Kinetic Experiments

Annulation reaction of benzyl azide and complexes **1<sub>Cu2a</sub>** and **1<sub>Cu1a</sub>**:

In a NMR tube, benzyl azide (0.3 mmol) was added to a solution of **1<sub>Cu2a</sub>** (0.015 mmol) in CD<sub>2</sub>Cl<sub>2</sub> (0.5 mL) and 1,2-dibromoethane (0.06 mmol) as internal standard. The reaction was monitored by <sup>1</sup>H NMR (Blue). The same procedure was used for the reaction involving **1<sub>Cu1a</sub>** (0.015 mmol, red).

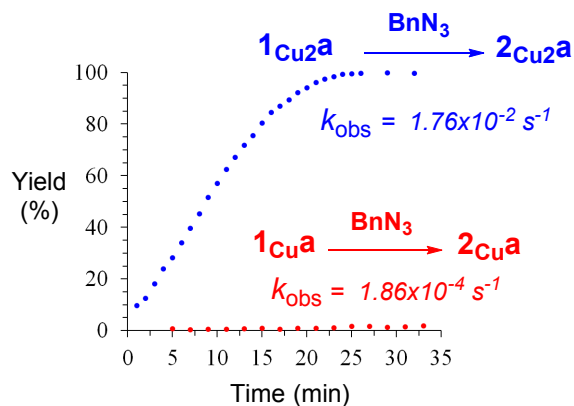

**Figure S17.** Evolution of the annulation reaction monitored by <sup>1</sup>H NMR

Proto-demetalation of complexes **2<sub>Cu2a</sub>** and **2<sub>Cu1a</sub>**:

In a NMR tube, phenylacetylene (0.3 mmol) was added to a solution of **2<sub>Cu2a</sub>** (0.015 mmol) in CD<sub>2</sub>Cl<sub>2</sub> (0.5 mL) with 1,2-dibromoethane (0.06 mmol) as internal standard. The reaction was monitored by <sup>1</sup>H NMR (Blue). The same procedure was used for the reaction involving **2<sub>Cu1a</sub>** (0.015 mmol, red).

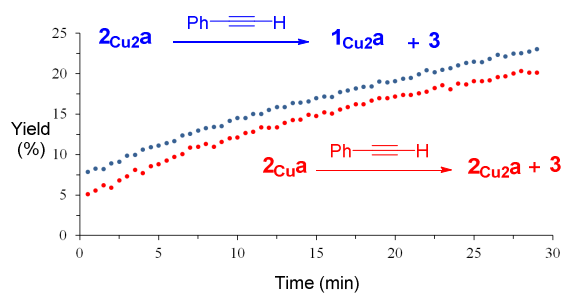

**Figure S18.** Evolution of the protodemetalation reaction monitored by <sup>1</sup>H NMR

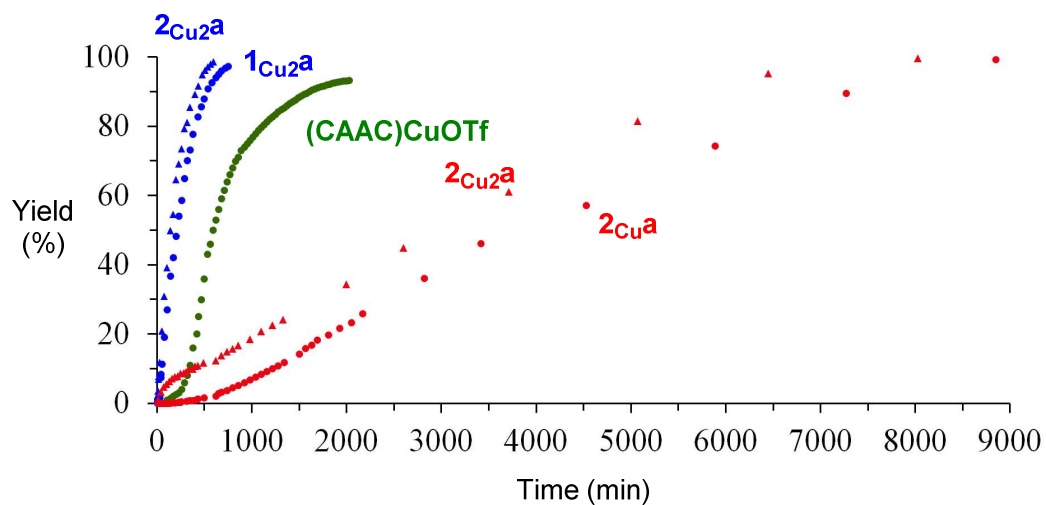

**Figure S19.** Evolution of the catalytic reaction between benzyl azide and phenyl acetylene monitored by  $^1\text{H}$  NMR

In NMR tube, a  $\text{CD}_2\text{Cl}_2$  solution (0.5 mL) of phenylacetylene (0.3 mmol), benzylazide (0.3 mmol), and 1,2-dibromoethane (0.06 mmol) as internal standard was added to the copper catalyst (**2Cu<sub>2</sub>a**, **1Cu<sub>2</sub>a**, (CAAC)CuOTf, **2Cu<sub>2</sub>a** and **1Cu<sub>2</sub>a**) (0.015 mmol). The reaction was monitored by  $^1\text{H}$  NMR.

## 4. X-Ray Diffraction Details

Bis(copper) acetylide complex **1Cu<sub>2</sub>a**:

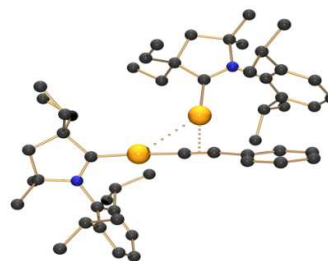

**Table S1.** Crystal data and structure refinement for **1Cu<sub>2</sub>a**.

|                                   |                                                                                                          |
|-----------------------------------|----------------------------------------------------------------------------------------------------------|
| Identification code               | <b>1Cu<sub>2</sub>a</b> (CCDC # 1042483 )                                                                |
| Empirical formula                 | C <sub>53</sub> H <sub>75</sub> Cu <sub>2</sub> F <sub>3</sub> N <sub>2</sub> O <sub>3</sub> S           |
| Molecular formula                 | C <sub>52</sub> H <sub>75</sub> Cu <sub>2</sub> N <sub>2</sub> , C F <sub>3</sub> O <sub>3</sub> S       |
| Formula weight                    | 1004.29                                                                                                  |
| Temperature                       | 100.0 K                                                                                                  |
| Wavelength                        | 0.71073 Å                                                                                                |
| Crystal system                    | Monoclinic                                                                                               |
| Space group                       | P 1 21/c 1                                                                                               |
| Unit cell dimensions              | a = 9.3364(9) Å      α = 90°.<br>b = 31.672(3) Å      β = 97.3090(10)°.<br>c = 17.7655(17) Å    γ = 90°. |
| Volume                            | 5210.6(9) Å <sup>3</sup>                                                                                 |
| Z                                 | 4                                                                                                        |
| Density (calculated)              | 1.280 Mg/m <sup>3</sup>                                                                                  |
| Absorption coefficient            | 0.909 mm <sup>-1</sup>                                                                                   |
| F(000)                            | 2128                                                                                                     |
| Crystal size                      | 0.215 x 0.122 x 0.104 mm <sup>3</sup>                                                                    |
| Crystal color, habit              | Yellow Block                                                                                             |
| Theta range for data collection   | 1.286 to 26.433°.                                                                                        |
| Index ranges                      | -11<=h<=11, -39<=k<=39, -22<=l<=22                                                                       |
| Reflections collected             | 78788                                                                                                    |
| Independent reflections           | 10713 [R(int) = 0.0464]                                                                                  |
| Completeness to theta = 25.000°   | 100.0 %                                                                                                  |
| Absorption correction             | Semi-empirical from equivalents                                                                          |
| Max. and min. transmission        | 0.0932 and 0.0656                                                                                        |
| Refinement method                 | Full-matrix least-squares on F <sup>2</sup>                                                              |
| Data / restraints / parameters    | 10713 / 2 / 607                                                                                          |
| Goodness-of-fit on F <sup>2</sup> | 1.017                                                                                                    |
| Final R indices [I>2sigma(I)]     | R1 = 0.0325, wR2 = 0.0741                                                                                |
| R indices (all data)              | R1 = 0.0444, wR2 = 0.0803                                                                                |
| Extinction coefficient            | n/a                                                                                                      |
| Largest diff. peak and hole       | 0.424 and -0.272 e.Å <sup>-3</sup>                                                                       |

Bis(copper) triazole complex **2<sub>Cu2a</sub>** (X = BF<sub>4</sub>):

**Table S2.** Crystal data and structure refinement for **2<sub>Cu2a</sub>** (X = BF<sub>4</sub>).

|                                   |                                                                                   |                 |
|-----------------------------------|-----------------------------------------------------------------------------------|-----------------|
| Identification code               | <b>2<sub>Cu2a</sub></b> (X = BF <sub>4</sub> ) (CCDC # 1042484)                   |                 |
| Empirical formula                 | C <sub>59</sub> H <sub>82</sub> B Cu <sub>2</sub> F <sub>4</sub> N <sub>5</sub>   |                 |
| Molecular formula                 | C <sub>59</sub> H <sub>82</sub> Cu <sub>2</sub> N <sub>5</sub> , B F <sub>4</sub> |                 |
| Formula weight                    | 1075.18                                                                           |                 |
| Temperature                       | 100.0 K                                                                           |                 |
| Wavelength                        | 0.71073 Å                                                                         |                 |
| Crystal system                    | Triclinic                                                                         |                 |
| Space group                       | P-1                                                                               |                 |
| Unit cell dimensions              | a = 9.365(2) Å                                                                    | α = 98.164(5)°. |
|                                   | b = 15.912(3) Å                                                                   | β = 97.065(5)°. |
|                                   | c = 19.408(4) Å                                                                   | γ = 96.941(5)°. |
| Volume                            | 2812.9(10) Å <sup>3</sup>                                                         |                 |
| Z                                 | 2                                                                                 |                 |
| Density (calculated)              | 1.269 Mg/m <sup>3</sup>                                                           |                 |
| Absorption coefficient            | 0.811 mm <sup>-1</sup>                                                            |                 |
| F(000)                            | 1140                                                                              |                 |
| Crystal size                      | 0.113 x 0.035 x 0.021 mm <sup>3</sup>                                             |                 |
| Crystal color, habit              | Yellow Needle                                                                     |                 |
| Theta range for data collection   | 1.071 to 25.642°.                                                                 |                 |
| Index ranges                      | -11 ≤ h ≤ 11, -19 ≤ k ≤ 19, -23 ≤ l ≤ 23                                          |                 |
| Reflections collected             | 44855                                                                             |                 |
| Independent reflections           | 10442 [R(int) = 0.0619]                                                           |                 |
| Completeness to theta = 25.000°   | 99.7 %                                                                            |                 |
| Absorption correction             | Semi-empirical from equivalents                                                   |                 |
| Max. and min. transmission        | 0.0613 and 0.0340                                                                 |                 |
| Refinement method                 | Full-matrix least-squares on F <sup>2</sup>                                       |                 |
| Data / restraints / parameters    | 10442 / 0 / 656                                                                   |                 |
| Goodness-of-fit on F <sup>2</sup> | 1.132                                                                             |                 |
| Final R indices [I > 2σ(I)]       | R1 = 0.0780, wR2 = 0.1933                                                         |                 |
| R indices (all data)              | R1 = 0.1110, wR2 = 0.2132                                                         |                 |
| Extinction coefficient            | n/a                                                                               |                 |
| Largest diff. peak and hole       | 1.446 and -1.191 e.Å <sup>-3</sup>                                                |                 |

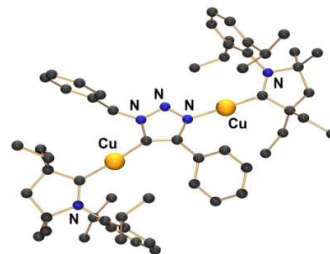



Bis(copper) triazole complex **1<sub>Cu2b</sub>** (X = BF<sub>4</sub>):

**Table S3.** Crystal data and structure refinement for **1<sub>Cu2b</sub>** (X = BF<sub>4</sub>).

|                                   |                                                                 |
|-----------------------------------|-----------------------------------------------------------------|
| Identification code               | <b>1<sub>Cu2b</sub></b> (X = BF <sub>4</sub> ) (CCDC # 1042482) |
| Empirical formula                 | C60.50 H84 B Cl3 Cu2 F4 N2                                      |
| Molecular formula                 | C59 H81 Cu2 N2, B F4, 1.5(C H2 Cl2),                            |
| Formula weight                    | 1159.53                                                         |
| Temperature                       | 100.0 K                                                         |
| Wavelength                        | 0.71073 Å                                                       |
| Crystal system                    | Triclinic                                                       |
| Space group                       | P-1                                                             |
| Unit cell dimensions              | a = 11.9729(9) Å<br>b = 18.9530(15) Å<br>c = 27.613(2) Å        |
| Volume                            | 5974.0(8) Å <sup>3</sup>                                        |
| Z                                 | 4                                                               |
| Density (calculated)              | 1.289 Mg/m <sup>3</sup>                                         |
| Absorption coefficient            | 0.897 mm <sup>-1</sup>                                          |
| F(000)                            | 2444                                                            |
| Crystal size                      | 0.255 x 0.247 x 0.153 mm <sup>3</sup>                           |
| Crystal color, habit              | Yellow Block                                                    |
| Theta range for data collection   | 1.102 to 24.999°.                                               |
| Index ranges                      | -13<=h<=14, -22<=k<=22, -32<=l<=29                              |
| Reflections collected             | 81431                                                           |
| Independent reflections           | 20999 [R(int) = 0.0419]                                         |
| Completeness to theta = 24.999°   | 99.7 %                                                          |
| Absorption correction             | Semi-empirical from equivalents                                 |
| Max. and min. transmission        | 0.0932 and 0.0665                                               |
| Refinement method                 | Full-matrix least-squares on F <sup>2</sup>                     |
| Data / restraints / parameters    | 20999 / 346 / 1517                                              |
| Goodness-of-fit on F <sup>2</sup> | 1.023                                                           |
| Final R indices [I>2sigma(I)]     | R1 = 0.0861, wR2 = 0.2427                                       |
| R indices (all data)              | R1 = 0.1113, wR2 = 0.2642                                       |
| Extinction coefficient            | n/a                                                             |
| Largest diff. peak and hole       | 1.082 and -1.193 e.Å <sup>-3</sup>                              |

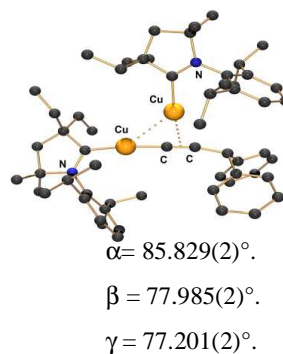

Supplement: 1500304_SM.pdf [file 1500304_SM.pdf]
